# Supplementary material for: Sensitivity of Aspergillus flavus Isolates from Peanut Seeds in Georgia to Azoxystrobin, a Quinone outside Inhibitor (QoI) Fungicide
Source: MDPI journal article supplement (doi:10.3390/jof7040284), 2021-04-09

**Supplementary file**

**Figure S1.** Colony morphology of *Aspergillus flavus* on peanut seed (A) and PDA plate (B)

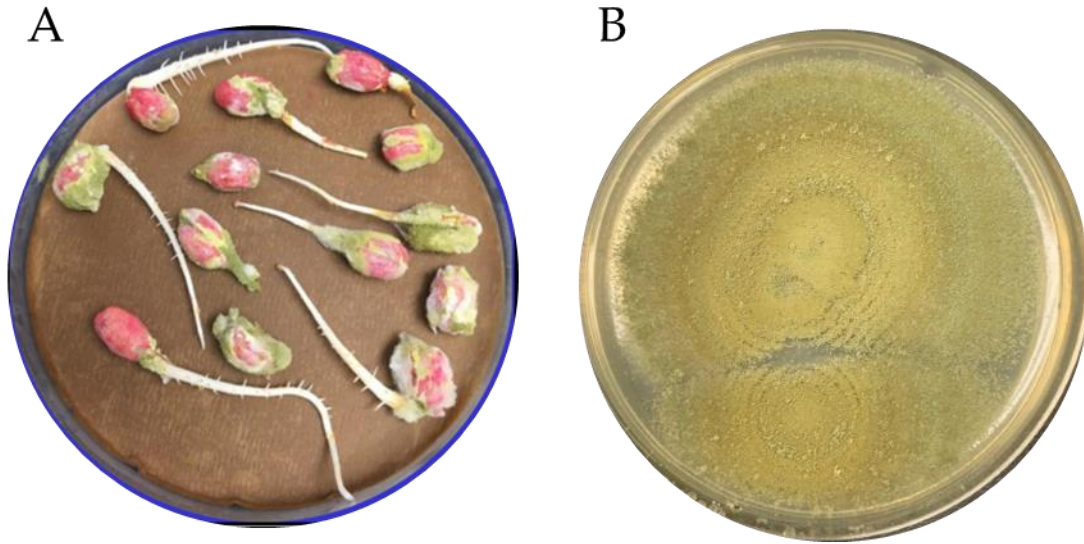

Supplement: s1 [file s1]
